# Supplementary material for: Systematic Literature Review to Assess the Cost and Resource Use Associated with Spinal Muscular Atrophy Management
Source: PubMed Central journal article supplement — Pharmacoeconomics. 2021 Nov 11;40(Suppl 1):11–38. doi: 10.1007/s40273-021-01105-7 (PMC8994738; doi:10.1007/s40273-021-01105-7), 2021-11-11
Supplement: 40273_2021_1105_MOESM1_ESM.pdf [file 40273_2021_1105_MOESM1_ESM.pdf]

**Systematic literature review to assess the cost and resource use associated with spinal muscular atrophy (SMA) management**

**Pharmacoeconomics: Online resource materials**

**Systematic literature review to assess the cost and resource use associated with spinal muscular atrophy (SMA) management**

Noman Paracha<sup>1</sup>, Pollyanna Hudson<sup>2</sup>, Stephen Mitchell<sup>2</sup> and C. Simone Sutherland<sup>1\*</sup>

1. F. Hoffmann-La Roche Ltd, Basel, Switzerland.
2. Mtech Access Limited, Bicester, Oxfordshire, United Kingdom.

**\*Corresponding author**

Contact email address: [simone.sutherland@roche.com](mailto:simone.sutherland@roche.com)

CONFIDENTIAL

**Systematic literature review to assess the cost and resource use associated with spinal muscular atrophy (SMA) management**

**Online Resource Table 1. Supplementary Sources**

| <b>Supplementary Sources</b>                                                                                                                                                                                                                                                                                                                                                                                                                                                                                                                                                                                                                                                                                                                                                           |
|----------------------------------------------------------------------------------------------------------------------------------------------------------------------------------------------------------------------------------------------------------------------------------------------------------------------------------------------------------------------------------------------------------------------------------------------------------------------------------------------------------------------------------------------------------------------------------------------------------------------------------------------------------------------------------------------------------------------------------------------------------------------------------------|
| <ul style="list-style-type: none"><li>• Reference lists of included studies</li></ul>                                                                                                                                                                                                                                                                                                                                                                                                                                                                                                                                                                                                                                                                                                  |
| <ul style="list-style-type: none"><li>• Conference proceedings (2017–2021):<ul style="list-style-type: none"><li>– American Academy of Neurology (AAN)</li><li>– European Academy of Neurology (EAN)</li><li>– The World Muscle Society (WMS)</li><li>– Cure SMA</li></ul></li></ul>                                                                                                                                                                                                                                                                                                                                                                                                                                                                                                   |
| <ul style="list-style-type: none"><li>• HTA agencies were searched to identify relevant, previous regulatory submissions in this indication:<ul style="list-style-type: none"><li>– National Institute for Health and Care Excellence (NICE)</li><li>– Scottish Medicines Consortium (SMC)</li><li>– Haute Autorité de Santé (HAS)</li><li>– Institute for Clinical and Economic Review (ICER)</li><li>– Institute for Quality and Efficiency in Health Care (IQWiG)</li><li>– Canadian Agency for Drugs and Technologies in Health (CADTH)</li><li>– Pharmaceutical Benefits Advisory Committee (PBAC)</li></ul></li></ul>                                                                                                                                                            |
| <ul style="list-style-type: none"><li>• Additional sources/websites:<ul style="list-style-type: none"><li>– Research Papers in Economics (RePEc): <a href="http://repec.org/">http://repec.org/</a></li><li>– Mapi Research Trust: <a href="https://mapi-trust.org/">https://mapi-trust.org/</a></li><li>– International Network of Agencies for Health Technology Assessment (INAHTA): <a href="http://www.inahta.org/">http://www.inahta.org/</a></li><li>– TreatSMA: <a href="https://www.treatsma.uk/">https://www.treatsma.uk/</a></li><li>– Spinal Muscular Atrophy UK: <a href="https://smauk.org.uk/">https://smauk.org.uk/</a></li><li>– Muscular Dystrophy UK: <a href="https://www.muscular dystrophyuk.org/">https://www.muscular dystrophyuk.org/</a></li></ul></li></ul> |

Abbreviations: *HTA* health technology assessment, *SMA* spinal muscular atrophy.

**Systematic literature review to assess the cost and resource use associated with spinal muscular atrophy (SMA) management**

**Online Resource Table 2. Search strategy**

| Search term number                                                                     | Search terms                                          | Original search, #<br>(Accessed 28 August 2019) | Update search, #<br>(Accessed 29 July 2021) |
|----------------------------------------------------------------------------------------|-------------------------------------------------------|-------------------------------------------------|---------------------------------------------|
| <b>Embase: 1974 to 28 August 2019 (original search) / 28 July 2021 (update search)</b> |                                                       |                                                 |                                             |
| 1                                                                                      | spinal muscular atrophy/                              | 6693                                            | 8059                                        |
| 2                                                                                      | myodystroph*.mp.                                      | 194                                             | 208                                         |
| 3                                                                                      | exp muscular dystrophy/                               | 41621                                           | 45678                                       |
| 4                                                                                      | (musc* adj2 (dystroph* or atroph*)).mp.               | 80411                                           | 90420                                       |
| 5                                                                                      | (kugelberg adj2 (syndrome or disease)).mp.            | 387                                             | 559                                         |
| 6                                                                                      | exp Kugelberg Welander disease/                       | 320                                             | 492                                         |
| 7                                                                                      | exp Werdnig Hoffmann disease/                         | 714                                             | 1046                                        |
| 8                                                                                      | Werdnig Hoffmann.mp.                                  | 828                                             | 1163                                        |
| 9                                                                                      | exp amyotrophic lateral sclerosis/                    | 35535                                           | 40821                                       |
| 10                                                                                     | amyotrophic lateral sclerosis.mp.                     | 39494                                           | 45435                                       |
| 11                                                                                     | (Lou Gehrig* adj2 (syndrome or disease)).mp.          | 228                                             | 247                                         |
| 12                                                                                     | 1 or 2 or 3 or 4 or 5 or 6 or 7 or 8 or 9 or 10 or 11 | 122541                                          | 138410                                      |
| 13                                                                                     | Socioeconomics/                                       | 134094                                          | 146742                                      |
| 14                                                                                     | Cost benefit analysis/                                | 81972                                           | 87576                                       |
| 15                                                                                     | Cost effectiveness analysis/                          | 144742                                          | 160648                                      |
| 16                                                                                     | Cost of illness/                                      | 18488                                           | 20026                                       |
| 17                                                                                     | Cost control/                                         | 66054                                           | 70906                                       |
| 18                                                                                     | Economic aspect/                                      | 110473                                          | 115777                                      |
| 19                                                                                     | Financial management/                                 | 110882                                          | 115475                                      |
| 20                                                                                     | Health care cost/                                     | 182184                                          | 199872                                      |
| 21                                                                                     | Health care financing/                                | 13116                                           | 13487                                       |
| 22                                                                                     | Health economics/                                     | 32150                                           | 33555                                       |
| 23                                                                                     | Hospital cost/                                        | 20500                                           | 22746                                       |
| 24                                                                                     | (fiscal or financial or finance or funding).tw.       | 180418                                          | 226886                                      |

**Systematic literature review to assess the cost and resource use associated with spinal muscular atrophy (SMA) management**

|                                                                                                                                                                                              |                                                                              |        |        |
|----------------------------------------------------------------------------------------------------------------------------------------------------------------------------------------------|------------------------------------------------------------------------------|--------|--------|
| 25                                                                                                                                                                                           | Cost minimisation analysis/                                                  | 3392   | 3665   |
| 26                                                                                                                                                                                           | (cost adj estimate\$).mp.                                                    | 3206   | 3711   |
| 27                                                                                                                                                                                           | (cost adj variable\$).mp.                                                    | 242    | 285    |
| 28                                                                                                                                                                                           | (unit adj cost\$).mp.                                                        | 4229   | 4883   |
| 29                                                                                                                                                                                           | ((indirect or direct or employe*) adj2 (cost* or resource* or benefit*)).mp. | 30009  | 34755  |
| 30                                                                                                                                                                                           | or/13-29                                                                     | 891041 | 995877 |
| 31                                                                                                                                                                                           | 12 and 30                                                                    | 1518   | 1845   |
| 32                                                                                                                                                                                           | limit 31 to yr="2019 -Current"                                               | –      | 421    |
| <b>Ovid MEDLINE(R) and Epub Ahead of Print, In-Process &amp; Other Non-Indexed Citations, Daily and Versions(R): 1946 to 28 August 2019 (original search) / 28 July 2021 (update search)</b> |                                                                              |        |        |
| 1                                                                                                                                                                                            | exp Muscular Atrophy, Spinal/                                                | 4723   | 5495   |
| 2                                                                                                                                                                                            | myodystroph*.mp.                                                             | 201    | 204    |
| 3                                                                                                                                                                                            | exp Muscular Dystrophies/                                                    | 25700  | 27697  |
| 4                                                                                                                                                                                            | (musc* adj2 (dystroph* or atroph*)).mp.                                      | 52147  | 57553  |
| 5                                                                                                                                                                                            | (kugelberg adj2 (syndrome or disease)).mp.                                   | 146    | 151    |
| 6                                                                                                                                                                                            | exp "Spinal Muscular Atrophies of Childhood"/                                | 1227   | 1432   |
| 7                                                                                                                                                                                            | Werdnig Hoffmann.mp.                                                         | 303    | 310    |
| 8                                                                                                                                                                                            | exp Amyotrophic Lateral Sclerosis/                                           | 17805  | 20287  |
| 9                                                                                                                                                                                            | amyotrophic lateral sclerosis.mp.                                            | 25726  | 29704  |
| 10                                                                                                                                                                                           | (Lou Gehrig* adj2 (syndrome or disease)).mp.                                 | 201    | 227    |
| 11                                                                                                                                                                                           | 1 or 2 or 3 or 4 or 5 or 6 or 7 or 8 or 9 or 10                              | 80598  | 90071  |
| 12                                                                                                                                                                                           | Economics/                                                                   | 27068  | 27350  |
| 13                                                                                                                                                                                           | cost analysis/                                                               | 47537  | 49795  |
| 14                                                                                                                                                                                           | Cost allocation/                                                             | 1998   | 2008   |
| 15                                                                                                                                                                                           | Cost-benefit analysis/                                                       | 77546  | 85558  |
| 16                                                                                                                                                                                           | Cost control/                                                                | 21384  | 21594  |
| 17                                                                                                                                                                                           | Cost savings/                                                                | 11332  | 12283  |
| 18                                                                                                                                                                                           | Cost of illness/                                                             | 25544  | 29184  |
| 19                                                                                                                                                                                           | Cost sharing/                                                                | 2447   | 2615   |

**Systematic literature review to assess the cost and resource use associated with spinal muscular atrophy (SMA) management**

|    |                                                                              |        |        |
|----|------------------------------------------------------------------------------|--------|--------|
| 20 | deductibles/                                                                 | 1720   | 1786   |
| 21 | coinsurance/                                                                 | 1720   | 1786   |
| 22 | Medical savings accounts/                                                    | 530    | 543    |
| 23 | Health care costs/                                                           | 37431  | 41722  |
| 24 | Direct service costs/                                                        | 1171   | 1204   |
| 25 | Drug costs/                                                                  | 15454  | 16698  |
| 26 | Employer health costs/                                                       | 1088   | 1094   |
| 27 | Hospital costs/                                                              | 10482  | 11549  |
| 28 | Health expenditures/                                                         | 19096  | 21658  |
| 29 | Capital expenditures/                                                        | 1987   | 1997   |
| 30 | Value of life/                                                               | 5653   | 5755   |
| 31 | exp economics, hospital/                                                     | 23785  | 25225  |
| 32 | exp economics, medical/                                                      | 14116  | 14269  |
| 33 | Economics, nursing/                                                          | 3989   | 4005   |
| 34 | Economics, pharmaceutical/                                                   | 2883   | 3005   |
| 35 | exp fees/                                                                    | 29842  | 30811  |
| 36 | exp charges/                                                                 | 29842  | 30811  |
| 37 | exp budgets/                                                                 | 13549  | 13861  |
| 38 | (low adj cost).mp.                                                           | 51799  | 67440  |
| 39 | (high adj cost).mp.                                                          | 13399  | 16301  |
| 40 | (health?care adj cost\$).mp.                                                 | 10484  | 13375  |
| 41 | (fiscal or funding or financial or finance).tw.                              | 137682 | 163232 |
| 42 | (cost adj estimate\$).mp.                                                    | 2145   | 2451   |
| 43 | (cost adj variable).mp.                                                      | 43     | 47     |
| 44 | (unit adj cost\$).mp.                                                        | 2381   | 2740   |
| 45 | (economic\$ or pharmacoeconomic\$ or price\$ or pricing).tw.                 | 279311 | 336596 |
| 46 | ((indirect or direct or employe*) adj2 (cost* or resource* or benefit*)).mp. | 28788  | 31724  |
| 47 | or/12-46                                                                     | 698929 | 809702 |
| 48 | 11 and 47                                                                    | 675    | 851    |

**Systematic literature review to assess the cost and resource use associated with spinal muscular atrophy (SMA) management**

|    |                                                                                                                                                                                                                                                                                                                                                                                                                                                                                                                                             |       |       |
|----|---------------------------------------------------------------------------------------------------------------------------------------------------------------------------------------------------------------------------------------------------------------------------------------------------------------------------------------------------------------------------------------------------------------------------------------------------------------------------------------------------------------------------------------------|-------|-------|
| 49 | limit 48 to yr="2019 -Current"                                                                                                                                                                                                                                                                                                                                                                                                                                                                                                              | –     | 226   |
|    | <b>EBM Reviews - Cochrane Database of Systematic Reviews 2005 to 21 August 2019, EBM Reviews - ACP Journal Club 1991 to July 2019, EBM Reviews - Database of Abstracts of Reviews of Effects 1st Quarter 2016, EBM Reviews - Cochrane Clinical Answers August 2019, EBM Reviews - Cochrane Central Register of Controlled Trials July 2019, EBM Reviews - Cochrane Methodology Register 3rd Quarter 2012, EBM Reviews - Health Technology Assessment 4th Quarter 2016, EBM Reviews - NHS Economic Evaluation Database 1st Quarter 2016:</b> |       |       |
| 1  | exp Muscular Atrophy, Spinal/                                                                                                                                                                                                                                                                                                                                                                                                                                                                                                               | 72    | 97    |
| 2  | myodystroph*.mp. [mp=ti, ab, tx, kw, ct, ot, sh, hw]                                                                                                                                                                                                                                                                                                                                                                                                                                                                                        | 2     | 3     |
| 3  | exp Muscular Dystrophies/                                                                                                                                                                                                                                                                                                                                                                                                                                                                                                                   | 396   | 476   |
| 4  | (musc* adj2 (dystroph* or atroph*)).mp. [mp=ti, ab, tx, kw, ct, ot, sh, hw]                                                                                                                                                                                                                                                                                                                                                                                                                                                                 | 2296  | 2861  |
| 5  | (kugelberg adj2 (syndrome or disease)).mp. [mp=ti, ab, tx, kw, ct, ot, sh, hw]                                                                                                                                                                                                                                                                                                                                                                                                                                                              | 17    | 24    |
| 6  | exp "Spinal Muscular Atrophies of Childhood"/                                                                                                                                                                                                                                                                                                                                                                                                                                                                                               | 24    | 28    |
| 7  | Werdnig Hoffmann.mp.                                                                                                                                                                                                                                                                                                                                                                                                                                                                                                                        | 15    | 18    |
| 8  | exp Amyotrophic Lateral Sclerosis/                                                                                                                                                                                                                                                                                                                                                                                                                                                                                                          | 492   | 595   |
| 9  | amyotrophic lateral sclerosis.mp.                                                                                                                                                                                                                                                                                                                                                                                                                                                                                                           | 1288  | 1546  |
| 10 | (Lou Gehrig* adj2 (syndrome or disease)).mp. [mp=ti, ab, tx, kw, ct, ot, sh, hw]                                                                                                                                                                                                                                                                                                                                                                                                                                                            | 29    | 32    |
| 11 | 1 or 2 or 3 or 4 or 5 or 6 or 7 or 8 or 9 or 10                                                                                                                                                                                                                                                                                                                                                                                                                                                                                             | 3578  | 4393  |
| 12 | Economics/                                                                                                                                                                                                                                                                                                                                                                                                                                                                                                                                  | 66    | 68    |
| 13 | cost analysis/                                                                                                                                                                                                                                                                                                                                                                                                                                                                                                                              | 3909  | 3978  |
| 14 | Cost allocation/                                                                                                                                                                                                                                                                                                                                                                                                                                                                                                                            | 16    | 16    |
| 15 | Cost-benefit analysis/                                                                                                                                                                                                                                                                                                                                                                                                                                                                                                                      | 18757 | 19542 |
| 16 | Cost control/                                                                                                                                                                                                                                                                                                                                                                                                                                                                                                                               | 285   | 289   |
| 17 | Cost savings/                                                                                                                                                                                                                                                                                                                                                                                                                                                                                                                               | 1031  | 1066  |
| 18 | Cost of illness/                                                                                                                                                                                                                                                                                                                                                                                                                                                                                                                            | 1393  | 1453  |
| 19 | Cost sharing/                                                                                                                                                                                                                                                                                                                                                                                                                                                                                                                               | 24    | 28    |
| 20 | deductibles/                                                                                                                                                                                                                                                                                                                                                                                                                                                                                                                                | 23    | 24    |
| 21 | coinsurance/                                                                                                                                                                                                                                                                                                                                                                                                                                                                                                                                | 23    | 24    |

**Systematic literature review to assess the cost and resource use associated with spinal muscular atrophy (SMA) management**

|    |                                                                                                                  |       |       |
|----|------------------------------------------------------------------------------------------------------------------|-------|-------|
| 22 | Medical savings accounts/                                                                                        | 0     | 1     |
| 23 | Health care costs/                                                                                               | 4862  | 5040  |
| 24 | Direct service costs/                                                                                            | 196   | 198   |
| 25 | Drug costs/                                                                                                      | 1805  | 1843  |
| 26 | Employer health costs/                                                                                           | 18    | 18    |
| 27 | Hospital costs/                                                                                                  | 1536  | 1577  |
| 28 | Health expenditures/                                                                                             | 366   | 402   |
| 29 | Capital expenditures/                                                                                            | 6     | 6     |
| 30 | Value of life/                                                                                                   | 148   | 148   |
| 31 | exp economics, hospital/                                                                                         | 1804  | 1855  |
| 32 | exp economics, medical/                                                                                          | 103   | 104   |
| 33 | Economics, nursing/                                                                                              | 20    | 20    |
| 34 | Economics, pharmaceutical/                                                                                       | 237   | 239   |
| 35 | exp fees/                                                                                                        | 513   | 522   |
| 36 | exp charges/                                                                                                     | 513   | 522   |
| 37 | exp budgets/                                                                                                     | 73    | 73    |
| 38 | (low adj cost).mp.                                                                                               | 4242  | 5456  |
| 39 | (high adj cost).mp.                                                                                              | 1350  | 1623  |
| 40 | (health?care adj cost\$).mp.                                                                                     | 2197  | 2807  |
| 41 | (fiscal or funding or financial or finance).tw.                                                                  | 42777 | 48407 |
| 42 | (cost adj estimate\$).mp.                                                                                        | 2547  | 2612  |
| 43 | (cost adj variable).mp.                                                                                          | 10    | 11    |
| 44 | (unit adj cost\$).mp.                                                                                            | 5488  | 5633  |
| 45 | (economic\$ or pharmacoeconomic\$ or price\$ or pricing).tw.                                                     | 42008 | 47381 |
| 46 | ((indirect or direct or employe*) adj2 (cost* or resource* or benefit*)).mp. [mp=ti, ab, tx, kw, ct, ot, sh, hw] | 11871 | 12558 |
| 47 | or/12-46                                                                                                         | 85613 | 98519 |
| 48 | 11 and 47                                                                                                        | 247   | 277   |
| 49 | limit 48 to yr="2019 -Current" [Limit not valid in DARE; records were retained]                                  | -     | 63    |

**Systematic literature review to assess the cost and resource use associated with spinal muscular atrophy (SMA) management**

| EconLit 1886 to 22 August 2019 (original search) / 22 July 2021 (update search) |                                                    |   |   |
|---------------------------------------------------------------------------------|----------------------------------------------------|---|---|
| 1                                                                               | amyotrophic lateral sclerosis.mp.                  | 3 | 3 |
| 2                                                                               | ((spin* or musc*) adj2 (dystroph* or atroph*)).mp. | 4 | 6 |
| 3                                                                               | 1 or 2                                             | 7 | 9 |
| 4                                                                               | limit 3 to yr="2019 -Current"                      | – | 2 |

Abbreviations: *ACP* American College of Physicians, *DARE* Database of Abstracts of Reviews of Effects, *EBM* Evidence-Based Medicine, *NHS* National Health Service.

CONFIDENTIAL



**Systematic literature review to assess the cost and resource use associated with spinal muscular atrophy (SMA) management**

**Online Resource Table 3. PICO Criteria and SLR Search Parameters**

| Category            | Details                                                                                                                                                                                                                                                                                                          |
|---------------------|------------------------------------------------------------------------------------------------------------------------------------------------------------------------------------------------------------------------------------------------------------------------------------------------------------------|
| Population          | <ul style="list-style-type: none"> <li>• Indication: Type 1, 2, 3 and/or 4 SMA, Kugelberg–Welander disease or Werdnig–Hoffmann disease, regardless of age of onset and severity</li> <li>• Myodystrophia, muscular dystrophy and amyotrophic lateral sclerosis</li> </ul>                                        |
| Intervention        | <ul style="list-style-type: none"> <li>• Not applicable</li> </ul>                                                                                                                                                                                                                                               |
| Comparator          | <ul style="list-style-type: none"> <li>• Not applicable</li> </ul>                                                                                                                                                                                                                                               |
| Outcomes            | <ul style="list-style-type: none"> <li>• Direct costs (including medical and non-medical)</li> <li>• Indirect costs (including caregiver-related costs)</li> <li>• Healthcare resource use</li> <li>• Cost drivers</li> </ul>                                                                                    |
| Study designs       | <ul style="list-style-type: none"> <li>• Economic evaluations reporting original cost data</li> <li>• Cost analyses</li> <li>• Cost/burden of illness studies</li> <li>• Randomised and non-randomised controlled trials</li> <li>• Observational and real-world evidence (e.g., registries, surveys)</li> </ul> |
| Language            | <ul style="list-style-type: none"> <li>• No restriction</li> </ul>                                                                                                                                                                                                                                               |
| Country             | <ul style="list-style-type: none"> <li>• No restriction</li> </ul>                                                                                                                                                                                                                                               |
| Date of publication | <ul style="list-style-type: none"> <li>• No restriction</li> </ul>                                                                                                                                                                                                                                               |

Abbreviations: *PICO* population, interventions, comparators, outcomes, *SLR* systematic literature review, *SMA* spinal muscular atrophy.

**Systematic literature review to assess the cost and resource use associated with spinal muscular atrophy (SMA) management**

**Online Resource Table 4. Resource use reported within identified articles (n=40)**

| <b>Reported resource use (number of publications)</b>                             | <b>Publications</b>                               |
|-----------------------------------------------------------------------------------|---------------------------------------------------|
| Requirement for respiratory support (n=30)                                        | [1-30]                                            |
| Length of stay in hospital (n=19)                                                 | [1, 3, 4, 8, 9, 17-19, 22-32]                     |
| Number of hospital admissions (n=24)                                              | [2-5, 7-9, 11, 17-19, 22-30, 32-35]               |
| Requirement for nutritional support (n=18)                                        | [3, 4, 6, 7, 9-11, 14, 17, 18, 20, 21, 26-30, 36] |
| Outpatient or specialist visits (n=20)                                            | [2, 4, 7, 9, 18-21, 23-30, 32-34, 37]             |
| Medication (non-DMT) resource use (n=15)                                          | [2, 4, 7, 9, 13, 20, 22, 25-29, 32-34]            |
| Patients requiring carers (n=16)                                                  | [7, 9, 20-23, 25, 26, 29, 30, 33, 34, 36-39]      |
| Patients requiring physiotherapy (n=9)                                            | [4, 9, 11, 20, 23, 25, 26, 29, 40]                |
| Use of assistive devices or medical aids such as care aids or adapted beds (n=14) | [7, 9, 19-23, 26, 28-30, 33, 34, 36]              |

Abbreviation: *DMT* disease-modifying therapy.

**Systematic literature review to assess the cost and resource use associated with spinal muscular atrophy (SMA) management**

**Online Resource Table 5. Quality assessment of full-text publications included in this systematic literature review (original search)**

| <b>Quality considerations</b>                                                       | [3]       | [4]       | [5]       | [6]       | [7] | [9] | [10] | [14] | [15] | [20]      | [34]      | [36] | [39] |
|-------------------------------------------------------------------------------------|-----------|-----------|-----------|-----------|-----|-----|------|------|------|-----------|-----------|------|------|
| 1. Was a clear definition of the illness given?                                     | YES       | YES       | YES       | YES       | YES | YES | YES  | YES  | NO   | YES       | YES       | YES  | YES  |
| 2. Were epidemiological sources carefully described?                                | YES       | YES       | NO        | YES       | YES | YES | YES  | YES  | NO   | YES       | YES       | NO   | YES  |
| 3. Were costs sufficiently disaggregated?                                           | NO        | YES       | NO        | NO        | YES | NO  | -    | -    | -    | YES       | YES       | -    | NO   |
| 4. Were activity data sources carefully described?                                  | YES       | YES       | YES       | YES       | YES | -   | NO   | NO   | NO   | YES       | YES       | NO   | NO   |
| 5. Were activity data appropriately assessed?                                       | Partially | Partially | Partially | Partially | YES | YES | NO   | NO   | NO   | Partially | Partially | NO   | NO   |
| 6. Were the sources of all cost values analytically described?                      | YES       | YES       | YES       | YES       | YES | YES | -    | -    | -    | YES       | YES       | -    | -    |
| 7. Were unit costs appropriately valued?                                            | YES       | YES       | YES       | YES       | YES | -   | -    | -    | -    | YES       | YES       | -    | -    |
| 8. Were the methods adopted carefully explained?                                    | YES       | YES       | YES       | YES       | YES | -   | -    | -    | -    | YES       | YES       | -    | -    |
| 9. Were costs discounted?                                                           | NO        | NO        | NO        | NO        | NO  | -   | -    | -    | -    | NO        | YES       | -    | -    |
| 10. Was the presentation of study results consistent with the methodology of study? | YES       | YES       | YES       | YES       | YES | -   | YES  | YES  | YES  | YES       | YES       | YES  | YES  |
| 11. Were the major assumptions tested in a sensitivity analysis?                    | YES       | YES       | NO        | NO        | YES | YES | NO   | NO   | NO   | NO        | NO        | NO   | NO   |

**Systematic literature review to assess the cost and resource use associated with spinal muscular atrophy (SMA) management**

|                        |    |     |    |    |     |   |   |   |   |    |     |   |   |
|------------------------|----|-----|----|----|-----|---|---|---|---|----|-----|---|---|
| <b>Overall quality</b> | ✓✓ | ✓✓✓ | ✓✓ | ✓✓ | ✓✓✓ | ✓ | ✓ | ✓ | - | ✓✓ | ✓✓✓ | - | ✓ |
|------------------------|----|-----|----|----|-----|---|---|---|---|----|-----|---|---|

✓ 3–5 quality considerations; ✓✓ 6–8 quality considerations; ✓✓✓ 9–11 quality considerations, where quality considerations refer to “yes” responses only; partially indicates insufficient information for a “yes” response, – not applicable

CONFIDENTIAL

**Systematic literature review to assess the cost and resource use associated with spinal muscular atrophy (SMA) management**

**Online Resource Table 6. Quality assessment of full-text publications included in this systematic literature review (update search)**

| <b>Quality considerations</b>                                                       | [22]      | [23]    | [24]    | [25]    | [26]    | [27]      | [28]      | [29]      | [33]      | [41]      | [42] |
|-------------------------------------------------------------------------------------|-----------|---------|---------|---------|---------|-----------|-----------|-----------|-----------|-----------|------|
| 1. Was a clear definition of the illness given?                                     | YES       | YES     | YES     | YES     | YES     | YES       | YES       | YES       | YES       | YES       | YES  |
| 2. Were epidemiological sources carefully described?                                | YES       | YES     | YES     | YES     | YES     | YES       | YES       | YES       | YES       | NO        | YES  |
| 3. Were costs sufficiently disaggregated?                                           | NO        | NO      | NO      | YES     | YES     | –         | YES       | Partially | YES       | YES       | –    |
| 4. Were activity data sources carefully described?                                  | YES       | YES     | YES     | YES     | YES     | YES       | YES       | YES       | YES       | YES       | YES  |
| 5. Were activity data appropriately assessed?                                       | YES       | YES     | YES     | YES     | YES     | YES       | YES       | YES       | YES       | YES       | YES  |
| 6. Were the sources of all cost values analytically described?                      | NO        | YES     | YES     | YES     | YES     | –         | NO        | YES       | NO        | YES       | –    |
| 7. Were unit costs appropriately valued?                                            | Unclear   | YES     | Unclear | YES     | YES     | –         | Unclear   | YES       | Unclear   | YES       | –    |
| 8. Were the methods adopted carefully explained?                                    | Partially | YES     | YES     | YES     | YES     | Partially | Partially | YES       | Partially | Partially | YES  |
| 9. Were costs discounted?                                                           | Unclear   | Unclear | Unclear | Unclear | Unclear | –         | Unclear   | Unclear   | Unclear   | Unclear   | –    |
| 10. Was the presentation of study results consistent with the methodology of study? | YES       | YES     | YES     | YES     | YES     | YES       | YES       | YES       | YES       | YES       | YES  |
| 11. Were the major assumptions tested in a sensitivity analysis?                    | NO        | NO      | NO      | NO      | NO      | NO        | NO        | NO        | NO        | NO        | NO   |
| <b>Overall quality</b>                                                              | ✓         | ✓✓      | ✓✓      | ✓✓✓     | ✓✓✓     | ✓         | ✓✓        | ✓✓        | ✓✓        | ✓✓        | ✓✓   |

**Systematic literature review to assess the cost and resource use associated with spinal muscular atrophy (SMA) management**

✓ 3–5 quality considerations; ✓✓ 6–8 quality considerations; ✓✓✓ 9–11 quality considerations, where quality considerations refer to “yes” responses only; partially indicates insufficient information for a “yes” response,  
– not applicable

CONFIDENTIAL

## Systematic literature review to assess the cost and resource use associated with spinal muscular atrophy (SMA) management

### References:

1. Arjunji R, Dean R, Jensen I, Miller B, Menier M, Sproule D et al., editors. Value of AVXS-101 for spinal muscular atrophy type 1: improved survival and motor function, lower use of pulmonary support with decreased hospitalization and associated costs. *European Journal of Neurology*; 2019: WILEY 111 River St, Hoboken 07030-5774, NJ USA.
2. Armstrong EP, Malone DC, Yeh WS, Dahl GJ, Lee RL, Sicignano N. The economic burden of spinal muscular atrophy. *J Med Econ*. 2016;19(8):822-6. <https://doi:10.1080/13696998.2016.1198355>.
3. Cardenas J, Menier M, Heitzer MD, Sproule DM. High Healthcare Resource Use in Hospitalized Patients with a Diagnosis of Spinal Muscular Atrophy Type 1 (SMA1): Retrospective Analysis of the Kids' Inpatient Database (KID). *Pharmacoecoon Open*. 2019;3(2):205-13. <https://doi:10.1007/s41669-018-0093-0>.
4. Droegge M, Sproule D, Arjunji R, Gauthier-Loiselle M, Cloutier M, Dabbous O. Economic burden of spinal muscular atrophy in the United States: a contemporary assessment. *J Med Econ*. 2020;23(1):70-9. <https://doi:10.1080/13696998.2019.1646263>.
5. Lee M, Jr., Franca UL, Graham RJ, McManus ML. Pre-Nusinersen Hospitalization Costs of Children With Spinal Muscular Atrophy. *Pediatr Neurol*. 2019;92:3-5. <https://doi:10.1016/j.pediatrneurol.2018.11.002>.
6. Lemoine TJ, Swoboda KJ, Bratton SL, Holubkov R, Mundorff M, Srivastava R. Spinal muscular atrophy type 1: are proactive respiratory interventions associated with longer survival? *Pediatr Crit Care Med*. 2012;13(3):e161-5. <https://doi:10.1097/PCC.0b013e3182388ad1>.
7. The Lewin Group. Cost of Amyotrophic Lateral Sclerosis, Muscular Dystrophy, and Spinal Muscular Atrophy in the United States - Final Report. 2012. [https://www.mda.org/sites/default/files/Cost\\_Illness\\_Report.pdf](https://www.mda.org/sites/default/files/Cost_Illness_Report.pdf). Accessed 13/11/2019.
8. Ali I, Gilchrist F, Carroll W, Alexander J, Clayton S, Willis T et al. G176(P) Healthcare utilisation in SMA type 1 patients treated with nusinersen. *Arch Dis Child*. 2019;104(Suppl 2):A71-A2. <https://doi:10.1136/archdischild-2019-rcpch.171>.
9. Chabanon A, Seferian AM, Daron A, Pereon Y, Cances C, Vuillerot C et al. Prospective and longitudinal natural history study of patients with Type 2 and 3 spinal muscular atrophy: Baseline data NatHis-SMA study. *PLoS One*. 2018;13(7):e0201004. <https://doi:10.1371/journal.pone.0201004>.
10. Dabbous O, Maru B, Jansen JP, Lorenzi M, Cloutier M, Guerin A et al. Survival, Motor Function, and Motor Milestones: Comparison of AVXS-101 Relative to Nusinersen for the Treatment of Infants with Spinal Muscular Atrophy Type 1. *Adv Ther*. 2019;36(5):1164-76. <https://doi:10.1007/s12325-019-00923-8>.
11. Droegge M, Dabbous O, Arjunji R, Gauthier-Loiselle M, Cloutier M, Sproule D. P. 062 Burden of illness of spinal muscular atrophy (SMA): an update. *Canadian Journal of Neurological Sciences*. 2019;46(s1):S30-S1.
12. Mikecin L, Popović L, Meštrović J, Novak M, Galić S, Čulić V et al. Long term mechanically ventilated children: Our experience. *Paediatrica Croatica*. 2009;53(1).
13. Moshe-Lilie O, Nizar C, Visser A, Dimitrova D, Karam C. Nusinersen in Adults with Spinal Muscular Atrophy, A Single Center Experience (P4.4-015). *Neurology*. 2019;92(15 Supplement):P4.-015.
14. Park HB, Lee SM, Lee JS, Park MS, Park KI, Namgung R et al. Survival analysis of spinal muscular atrophy type I. *Korean J Pediatr*. 2010;53(11):965-70. <https://doi:10.3345/kjp.2010.53.11.965>.
15. Sakakihara Y, Yamanaka T, Kajii M, Kamoshita S. Long-term ventilator-assisted children in Japan: a national survey. *Acta Paediatr Jpn*. 1996;38(2):137-42. <https://doi:10.1111/j.1442-200x.1996.tb03456.x>.
16. Sansone VA, De Vivo DC, Bertini E, Hwu WL, Crawford TO, Swoboda KJ et al., editors. Nusinersen in infants who initiate treatment in a presymptomatic stage of Spinal Muscular Atrophy (SMA): interim results from the phase 2 NURTURE study. 5th Congress of the European Academy of Neurology; 2019; Oslo, Norway.
17. Shell R, Al-Zaidy S, Arnold W, Rodino-Klapac L, Prior T, Kotha K et al., editors. AVXS-101 Phase 1 Gene Therapy Clinical Trial in Spinal Muscular Atrophy Type 1 (SMA1): Improvement in Respiratory and Bulbar Function Reduces Frequency and Duration of Hospitalizations Compared to Natural History. *Ann Neurol*; 2018: WILEY 111 River St, Hoboken 07030-5774, NJ USA.
18. Teynor M, Zhou J, Hou Q, Wells W, Hall E, Avendano J. Retrospective Analysis of Healthcare Resource Utilization (HRU) in Patients with Spinal Muscular Atrophy (SMA) in MarketScan® (P3.186). *Neurology*. 2017;88(16 Supplement):P3.186.
19. Goble J, Dai D, Boulos F, Weng A, Johnson K, editors. The economic burden of spinal muscular atrophy patients in a commercially-insured population in the United States. AMCP Managed Care & Specialty Pharmacy Annual Meeting; 2018: J Manag Care Spec Pharm.

## Systematic literature review to assess the cost and resource use associated with spinal muscular atrophy (SMA) management

20. Klug C, Schreiber-Katz O, Thiele S, Schorling E, Zowe J, Reilich P et al. Disease burden of spinal muscular atrophy in Germany. *Orphanet J Rare Dis.* 2016;11(1):58. <https://doi:10.1186/s13023-016-0424-0>.
21. SMA UK. What two recent surveys told us about how SMA impacts patients' and caregivers' lives. 2019.
22. Ali I, Gilchrist FJ, Carroll WD, Alexander J, Clayton S, Kulshrestha R et al. Healthcare utilisation in children with SMA type 1 treated with nusinersen: a single centre retrospective review. *BMJ Paediatr Open.* 2019;3(1):e000572. <https://doi:10.1136/bmjpo-2019-000572>.
23. Belter L, Cruz R, Kulas S, McGinnis E, Dabbous O, Jarecki J. Economic burden of spinal muscular atrophy: an analysis of claims data. *J Mark Access Health Policy.* 2020;8(1):1843277. <https://doi:10.1080/20016689.2020.1843277>.
24. Darba J, Marsa A. Patient characteristics and hospitalisation costs of spinal muscular atrophy in Spain: a retrospective multicentre database analysis. *BMJ Open.* 2019;9(11):e031271. <https://doi:10.1136/bmjopen-2019-031271>.
25. Darba J. Direct Medical Costs of Spinal Muscular Atrophy in the Catalonia Region: A Population-Based Analysis. *Clin Drug Investig.* 2020;40(4):335-41. <https://doi:10.1007/s40261-020-00897-4>.
26. Chambers GM, Settumba SN, Carey KA, Cairns A, Menezes MP, Ryan M et al. Prenusinersen economic and health-related quality of life burden of spinal muscular atrophy. *Neurology.* 2020;95(1):e1-e10. <https://doi:10.1212/WNL.0000000000009715>.
27. Darba J. Management and current status of spinal muscular atrophy: a retrospective multicentre claims database analysis. *Orphanet J Rare Dis.* 2020;15(1):8. <https://doi:10.1186/s13023-019-1287-y>.
28. Johnson NB, Proud C, Wassel CL, Dreyfus J, Cochrane T, Paradis AD. Characterization of Adult Patients With SMA Treated in US Hospital Settings: A Natural History Study in the Premier Healthcare Database. *J Neuromuscul Dis.* 2021;8(4):569-78. <https://doi:10.3233/JND-200624>.
29. Tan H, Gu T, Chen E, Punekar R, Shieh PB. Healthcare Utilization, Costs of Care, and Mortality Among Patients With Spinal Muscular Atrophy. *J Health Econ Outcomes Res.* 2019;6(3):185-95. <https://doi:10.36469/63185>.
30. Rowell J, Vincent SA, Saberian S, Scoto M, Muntoni F. PRO22 A Real World Study Investigating the Resource Use and Burden Associated with Spinal Muscular Atrophy (SMA) from the Perspective of Patients and Carers in the UK. *Value in Health.* 2020;23:S693. <https://doi:10.1016/j.jval.2020.08.1758>.
31. Arjunji R, Dean R, Jensen IS, Miller B, Menier M, Sproule DM et al. PBI10 Type I Spinal muscular atrophy patients treated with AVXS-101 have lower use of ventilatory support, hospitalization, and associated costs compared to those treated with nusinersen. *Value in Health.* 2019;22:S48. <https://doi:10.1016/j.jval.2019.04.093>.
32. Dabbous O, Seda J, Sproule DM. Economic Burden of Infant-Onset (Type 1) Spinal Muscular Atrophy: A Retrospective Claims Database Analysis. *Value in Health.* 2018;21:S251. <https://doi:10.1016/j.jval.2018.04.1697>.
33. McMillan HJ, Gerber B, Cowling T, Khoo W, Mayer M, Wu JW et al. Burden of Spinal Muscular Atrophy (SMA) on Patients and Caregivers in Canada. *J Neuromuscul Dis.* 2021;8(4):553-68. <https://doi:10.3233/JND-200610>.
34. Lopez-Bastida J, Pena-Longobardo LM, Aranda-Reneo I, Tizzano E, Sefton M, Oliva-Moreno J. Social/economic costs and health-related quality of life in patients with spinal muscular atrophy (SMA) in Spain. *Orphanet J Rare Dis.* 2017;12(1):141. <https://doi:10.1186/s13023-017-0695-0>.
35. Wells W, Hall E, Scaife J, Hadker N, Miyasoto G, editors. Determining the cost of care for spinal muscular atrophy using retrospective claims analysis. *AMCP Managed Care & Specialty Pharmacy Annual Meeting; 2017: J Manag Care Spec Pharm.*
36. Farrar MA, Carey KA, Paguinto SG, Chambers G, Kasparian NA. Financial, opportunity and psychosocial costs of spinal muscular atrophy: an exploratory qualitative analysis of Australian carer perspectives. *BMJ Open.* 2018;8(5):e020907. <https://doi:10.1136/bmjopen-2017-020907>.
37. Marcellusi A, Bini C, Casiraghi J, D'Ambrosio F, Rotundo MA, Pallara A et al. Cost of illness of spinal muscular atrophy (SMA) in Italy. *Global & Regional Health Technology Assessment.* 2019;2019:2284240319867662.
38. Belter L, Jarecki J, Cruz R, O'Toole CM, O'Brien K, Reyna S et al. Ambulation Status, Role Participation and Caregiver Assistance among Individuals with Spinal Muscular Atrophy Type III: Results from the 2018 Cure SMA Membership Survey (P1.6-061). *Neurology.* 2019;92(15 Supplement):P1.6-061.
39. Sampson C, Garau M. How Should We Measure Quality of Life Impact in Rare Disease? Recent Learnings in Spinal Muscular Atrophy. *Office of Health Economics.* 2019. <https://www.ohc.org/publications/how-should-we-measure-quality-life-impact-rare-disease-recent-learnings-spinal-muscular>. Accessed 13/11/2019.



**Systematic literature review to assess the cost and resource use associated with spinal muscular atrophy (SMA) management**

40. Pelton T, Allen S, Helen C, Glover S. Case series report to observe feasibility of biweekly physiotherapy involving dynamic tilt table standing in ambulatory neuromuscular patients. *Physiotherapy*. 2016;102:e77-e8. <https://doi:10.1016/j.physio.2016.10.074>.

41. Pena-Longobardo LM, Aranda-Reneo I, Oliva-Moreno J, Litzkendorf S, Durand-Zaleski I, Tizzano E et al. The Economic Impact and Health-Related Quality of Life of Spinal Muscular Atrophy. An Analysis across Europe. *Int J Environ Res Public Health*. 2020;17(16):5640. <https://doi:10.3390/ijerph17165640>.

42. Aranda-Reneo I, Pena-Longobardo LM, Oliva-Moreno J, Litzkendorf S, Durand-Zaleski I, Tizzano EF et al. The Burden of Spinal Muscular Atrophy on Informal Caregivers. *Int J Environ Res Public Health*. 2020;17(23):8989. <https://doi:10.3390/ijerph17238989>.

CONFIDENTIAL
